# Supplementary material for: Exposomics as a discovery engine: a systematic scoping review of emerging environmental contaminants and novel biological effects
Source: Research Square preprint supplement (doi:10.21203/rs.3.rs-7543046/v1), 2025-09-23
Supplement: Supplementary file 1 [file 0a4725214990d5a835f0c28c.docx]

| **Section and Topic** | **Item #** | **Checklist item** | **Location where item is reported** |
| --- | --- | --- | --- |
| **TITLE** | | |  |
| Title | 1 | Identify the report as a systematic review. | Title page — “Exposomics as a discovery engine: a systematic scoping review of emerging environmental contaminants and novel biological effects”. |
| **ABSTRACT** | | |  |
| Abstract | 2 | See the PRISMA 2020 for Abstracts checklist. | Abstract (entire section states scoping review/PRISMA-ScR, sources, dates, counts). |
| **INTRODUCTION** | | |  |
| Rationale | 3 | Describe the rationale for the review in the context of existing knowledge. | Introduction — first 2–3 paragraphs (rationale, gap). |
| Objectives | 4 | Provide an explicit statement of the objective(s) or question(s) the review addresses. | Introduction — final paragraph (aims) and Methods — “Objectives and PECO framework”. |
| **METHODS** | | |  |
| Eligibility criteria | 5 | Specify the inclusion and exclusion criteria for the review and how studies were grouped for the syntheses. | Methods — “Objectives and PECO framework” and “Screening and study selection” (inclusion/exclusion). |
| Information sources | 6 | Specify all databases, registers, websites, organisations, reference lists and other sources searched or consulted to identify studies. Specify the date when each source was last searched or consulted. | Methods — “Information sources and search strategy” (databases, grey literature, coverage dates; initial search 17 Feb 2025; update 15 May 2025). |
| Search strategy | 7 | Present the full search strategies for all databases, registers and websites, including any filters and limits used. | Methods — “Information sources and search strategy”; Supplementary File S1 (full search strings; Zenodo DOI 10.5281/zenodo.16790030). |
| Selection process | 8 | Specify the methods used to decide whether a study met the inclusion criteria of the review, including how many reviewers screened each record and each report retrieved, whether they worked independently, and if applicable, details of automation tools used in the process. | Methods — “Screening and study selection” (two independent reviewers; arbitration by third). |
| Data collection process | 9 | Specify the methods used to collect data from reports, including how many reviewers collected data from each report, whether they worked independently, any processes for obtaining or confirming data from study investigators, and if applicable, details of automation tools used in the process. | Methods — “Data charting” (piloted REDCap template; double extraction on 20%; variables). |
| Data items | 10a | List and define all outcomes for which data were sought. Specify whether all results that were compatible with each outcome domain in each study were sought (e.g. for all measures, time points, analyses), and if not, the methods used to decide which results to collect. | Methods — “Objectives and PECO framework” (Outcomes); Results — Figure 4 (outcome domains). |
| 10b | List and define all other variables for which data were sought (e.g. participant and intervention characteristics, funding sources). Describe any assumptions made about any missing or unclear information. | Methods — “Data charting” (study identifiers, country, matrix, contaminant class, platform/software, Schymanski level, regulatory status, biological signals). |
| Study risk of bias assessment | 11 | Specify the methods used to assess risk of bias in the included studies, including details of the tool(s) used, how many reviewers assessed each study and whether they worked independently, and if applicable, details of automation tools used in the process. | Methods — “Critical appraisal” (RoB2, ROBINS-E/analogous domains). |
| Effect measures | 12 | Specify for each outcome the effect measure(s) (e.g. risk ratio, mean difference) used in the synthesis or presentation of results. | Not applicable (no effect measures pooled) — Methods — “Data synthesis” (descriptive mapping only). |
| Synthesis methods | 13a | Describe the processes used to decide which studies were eligible for each synthesis (e.g. tabulating the study intervention characteristics and comparing against the planned groups for each synthesis (item #5)). | Methods — “Data synthesis” (what was summarised and how items were grouped/displayed). |
| 13b | Describe any methods required to prepare the data for presentation or synthesis, such as handling of missing summary statistics, or data conversions. | Methods — “Data charting” (harmonised dataset; pre-processing/variables) and identification confidence scheme. |
| 13c | Describe any methods used to tabulate or visually display results of individual studies and syntheses. | Methods — “Data synthesis”; Results — Figures 3–5 and Table 1 (tabulation/visual displays). |
| 13d | Describe any methods used to synthesize results and provide a rationale for the choice(s). If meta-analysis was performed, describe the model(s), method(s) to identify the presence and extent of statistical heterogeneity, and software package(s) used. | Not applicable (no statistical synthesis/meta-analysis) — Methods — “Data synthesis”. |
| 13e | Describe any methods used to explore possible causes of heterogeneity among study results (e.g. subgroup analysis, meta-regression). | Not applicable (no heterogeneity analyses). |
| 13f | Describe any sensitivity analyses conducted to assess robustness of the synthesized results. | Not applicable (no sensitivity analyses). |
| Reporting bias assessment | 14 | Describe any methods used to assess risk of bias due to missing results in a synthesis (arising from reporting biases). | Not applicable (no synthesis-level reporting bias assessment performed). |
| Certainty assessment | 15 | Describe any methods used to assess certainty (or confidence) in the body of evidence for an outcome. | Not applicable (no certainty/GRADE assessment). |
| **RESULTS** | | |  |
| Study selection | 16a | Describe the results of the search and selection process, from the number of records identified in the search to the number of studies included in the review, ideally using a flow diagram. | Results — “Study selection” paragraph and Figure 2 (PRISMA 2020 flow diagram with counts). |
| 16b | Cite studies that might appear to meet the inclusion criteria, but which were excluded, and explain why they were excluded. | Results — “Study selection” (reasons for exclusion); Supplementary File S2 (list of exclusions with reasons). |
| Study characteristics | 17 | Cite each included study and present its characteristics. | Results — “Descriptive overview of included evidence”; Supplementary File S3 (full study characteristics). |
| Risk of bias in studies | 18 | Present assessments of risk of bias for each included study. | Methods — “Critical appraisal”; Supplementary File S3 (per-study RoB domain ratings). |
| Results of individual studies | 19 | For all outcomes, present, for each study: (a) summary statistics for each group (where appropriate) and (b) an effect estimate and its precision (e.g. confidence/credible interval), ideally using structured tables or plots. | Results — “Discovery yield” and Table 1 (priority contaminants with signals/context). |
| Results of syntheses | 20a | For each synthesis, briefly summarise the characteristics and risk of bias among contributing studies. | Results — narrative under “Descriptive overview of included evidence” + Methods — “Critical appraisal” (summary of characteristics and RoB). |
| 20b | Present results of all statistical syntheses conducted. If meta-analysis was done, present for each the summary estimate and its precision (e.g. confidence/credible interval) and measures of statistical heterogeneity. If comparing groups, describe the direction of the effect. | Not applicable (no statistical syntheses/meta-analyses presented). |
| 20c | Present results of all investigations of possible causes of heterogeneity among study results. | Not applicable (no investigations of statistical heterogeneity). |
| 20d | Present results of all sensitivity analyses conducted to assess the robustness of the synthesized results. | Not applicable (no sensitivity analyses). |
| Reporting biases | 21 | Present assessments of risk of bias due to missing results (arising from reporting biases) for each synthesis assessed. | Not applicable (no synthesis-level reporting bias assessment). |
| Certainty of evidence | 22 | Present assessments of certainty (or confidence) in the body of evidence for each outcome assessed. | Not applicable (no certainty/GRADE assessment). |
| **DISCUSSION** | | |  |
| Discussion | 23a | Provide a general interpretation of the results in the context of other evidence. | Discussion — opening paragraphs (overall interpretation vs existing evidence). |
| 23b | Discuss any limitations of the evidence included in the review. | Discussion — paragraph beginning “At the same time, significant limitations…” (limitations of included evidence). |
| 23c | Discuss any limitations of the review processes used. | Method - English-only, 2015–2025 window, no meta-analysis). |
| 23d | Discuss implications of the results for practice, policy, and future research. | Discussion — “Implications for research, surveillance, and policy”. |
| **OTHER INFORMATION** | | |  |
| Registration and protocol | 24a | Provide registration information for the review, including register name and registration number, or state that the review was not registered. | Methods — “Protocol and reporting” (review not registered in PROSPERO; protocol archived on Zenodo). |
| 24b | Indicate where the review protocol can be accessed, or state that a protocol was not prepared. | Methods — “Protocol and reporting” (protocol access: Zenodo DOI 10.5281/zenodo.16790030). |
| 24c | Describe and explain any amendments to information provided at registration or in the protocol. | Methods — “Protocol and reporting” and Supplementary File S1 (documented amendments). |
| Support | 25 | Describe sources of financial or non-financial support for the review, and the role of the funders or sponsors in the review. | Acknowledgements (funding/support details). |
| Competing interests | 26 | Declare any competing interests of review authors. | Acknowledgements “Competing interests” statement under Declarations. |
| Availability of data, code and other materials | 27 | Report which of the following are publicly available and where they can be found: template data collection forms; data extracted from included studies; data used for all analyses; analytic code; any other materials used in the review. | Methods — “Data charting” (dataset archived); Results — Figure 2 caption; Zenodo DOI 10.5281/zenodo.16790030. |

*From:*  Page MJ, McKenzie JE, Bossuyt PM, Boutron I, Hoffmann TC, Mulrow CD, et al. The PRISMA 2020 statement: an updated guideline for reporting systematic reviews. BMJ 2021;372:n71. doi: 10.1136/bmj.n71. This work is licensed under CC BY 4.0. To view a copy of this license, visit <https://creativecommons.org/licenses/by/4.0/>
