# Supplementary material for: Exposomics as a discovery engine: a systematic scoping review of emerging environmental contaminants and novel biological effects
Source: Research Square preprint supplement (doi:10.21203/rs.3.rs-7543046/v1), 2025-09-23
Supplement: Supplementary file 2 [file 70be4a66c6fe6e5a092d3343.xlsx]

## Sheet: Metadata
Study ID	Citation	Study Design	Domain 1	Domain 2	Domain 3	Domain 4	Domain 5	Domain 6	Domain 7	Overall RoB	Notes/Justification
Agrawal2025	Agrawal et al. 2025	Nested case-control	Some Concerns	Low	Low	Low	Low	Some Concerns	Some Concerns	Some Concerns	Matched case-control; residual confounding likely.
Arora2017	Arora et al. 2017	Twin case-control	Some Concerns	Some Concerns	Low	Low	Some Concerns	Low	Some Concerns	Some Concerns	Within-twin design reduces genetic bias; small N; no preregistration.
Bart2022	Bart et al. 2022	Animal mechanistic study	High	High	High	Low	Low	Some Concerns	N/A	High	No randomisation/blinding; survival data complete; selective-reporting risk moderate.
Ankley2016	Ankley et al. 2016	Narrative review	N/A	N/A	N/A	N/A	N/A	N/A	N/A	N/A	Review article – RoB not applicable; use SANRA/AMSTAR-2 if desired.
UNEP2022	UNEP 2022 plastics resolution	Grey-literature report	N/A	N/A	N/A	N/A	N/A	N/A	N/A	N/A	Policy/grey report – RoB not applicable; AACODS checklist if desired.
Bois2017	Bois et al. 2017	Computational modelling (high-throughput in silico)	High	Some Concerns	High	High	Some Concerns	Low	Low	High	Non-human in silico models; uncertain exposure estimates; extensive simulations but limited real-world validation.
Boyer2023	Boyer et al. 2023	Observational cohort (Strong Heart Study)	Low	Low	Some Concerns	Low	Low	Some Concerns	Some Concerns	Some Concerns	Large sample, good confounder adjustment, but mixture exposure modelling and some missing exposure data.
Bozack2021	Bozack et al. 2021	Prospective birth cohort	Low	Low	Some Concerns	Low	Low	Low	Low	Low	Moderate sample size; robust exposure and methylation measures; appropriate adjustment; persistence tested.
Chao2022	Chao et al. 2022	Cross-sectional, case-control, exposomics	Some Concerns	Some Concerns	Some Concerns	Low	Some Concerns	Low	Some Concerns	Some Concerns	Non-randomised, cross-sectional; novel exposomic/omic linkage but limited sample, possible confounding.
EUCom2020	EU Chemicals Strategy for Sustainability	Policy/strategy document	N/A	N/A	N/A	N/A	N/A	N/A	N/A	N/A	Official EU policy/strategy document; RoB not applicable; use AACODS if quality appraisal needed.
EU2023Reg	Commission Regulation (EU) 2023/2055	Regulation/policy document	N/A	N/A	N/A	N/A	N/A	N/A	N/A	N/A	Official EU regulation on synthetic polymer microparticles; RoB not applicable. Policy/grey report.
Ding2024	Ding et al. 2024	Longitudinal panel (BAPE study, China)	Low	Low	Some Concerns	Low	Some Concerns	Low	Low	Some Concerns	Longitudinal, multi-omics exposome study in older adults. Good repeat sampling and adjustment; possible residual confounding; no randomisation.
Domingo2024	Domingo-Relloso et al. 2024	Prospective cohort (MESA, USA)	Low	Low	Some Concerns	Low	Low	Low	Low	Low	Large, multiethnic US cohort with repeated measures, robust adjustment for covariates, minimal missing data, long follow-up.
Donald2016	Donald et al. 2016	Cross-sectional exposome study (Senegal, wristbands)	Some Concerns	Some Concerns	Some Concerns	Some Concerns	Some Concerns	Low	Some Concerns	Some Concerns	Small N, passive sampling for exposure, no outcome/health link, basic confounder adjustment; innovative method but risk of bias present.
Fox2021	Fox et al. 2021	Prospective cohort (San Luis Valley Diabetes Study)	Some Concerns	Low	Low	Low	Low	Low	Low	Low	Strong for exposure and outcome assessment, good adjustment, prospective design, some loss to follow-up, detailed confounder control.
Pegado2024	Fraiha-Pegado et al. 2024	Systematic review	N/A	N/A	N/A	N/A	N/A	N/A	N/A	N/A	Review (systematic): RoB not applicable; consider SANRA/AMSTAR-2 if needed.
Godbole2024	Godbole et al. 2024	Cross-sectional, NHANES	Some Concerns	Some Concerns	Low	Low	Some Concerns	Low	Some Concerns	Some Concerns	Representative US sample, good covariate adjustment, cross-sectional design, cannot infer causality. Exposure via biomarkers; some self-report data; possible residual confounding.
Gould2024	Gould et al. 2024	Animal mechanistic study	High	High	Some Concerns	Low	Low	Some Concerns	N/A	High	No randomization/blinding; environmental relevance moderate; endpoints objective but lab study.
HBM4EU2022	HBM4EU Project Report	Project summary/report	N/A	N/A	N/A	N/A	N/A	N/A	N/A	N/A	European exposome project/program report; no primary data, not RoB applicable.
Hopkins2018	Hopkins et al. 2018	Peer-reviewed review/report	N/A	N/A	N/A	N/A	N/A	N/A	N/A	N/A	Review/policy summary on GenX and PFAS; not RoB applicable.
Hu2021	Hu et al. 2021	Animal mechanistic/metabolomics	High	Some Concerns	High	Low	Low	Low	N/A	High	Animal model; non-randomized, omics endpoints; possible batch effects, good reporting.
HumanExp2022	Human Exposome Project 2022	Web summary/project description	N/A	N/A	N/A	N/A	N/A	N/A	N/A	N/A	Web/EC project/program; no RoB possible.
RegWater2022	EU Commission 2022 Water Regulation	Regulation/policy document	N/A	N/A	N/A	N/A	N/A	N/A	N/A	N/A	Policy/legislative document; no RoB possible; use AACODS if quality check needed.
WorkshopISGlobal2024	ISGlobal Workshop Series 2024	Web workshop summary	N/A	N/A	N/A	N/A	N/A	N/A	N/A	N/A	Workshop/web summary, no RoB applicable.
Jenner2022	Jenner et al. 2022	Human observational, lab-based	Some Concerns	Some Concerns	Low	Low	Some Concerns	Low	Some Concerns	Some Concerns	Small N, strict contamination controls, human tissue, descriptive only; potential selection bias, strong QA/QC for microplastic analysis.
Johnson2025	Johnson et al. 2025	Cross-sectional exposome study (NTA, HRMS)	Some Concerns	Low	Some Concerns	Low	Some Concerns	Some Concerns	Some Concerns	Some Concerns	Small N (n=45), single city, robust exposure and QC, advanced mass spectrometry, possible selection bias, multiple statistical tests without correction.	:contentReference[oaicite:0]{index=0}
Kessing2017	Kessing et al. 2017	Nested case-control (Danish registry study)	Low	Low	Low	Low	Low	Some Concerns	Some Concerns	Low	Large sample, excellent exposure assessment, robust linkage, matching; possible ecological/municipality confounding, no experimental assignment.	:contentReference[oaicite:1]{index=1}
Khodasevich2025	Khodasevich et al. 2025	Cross-sectional, exposome-wide association (NHANES)	Some Concerns	Low	Some Concerns	Low	Low	Low	Some Concerns	Some Concerns	Representative sample, robust adjustment, cross-sectional, EAA/omics endpoints, multiple testing, moderate sample size.	:contentReference[oaicite:2]{index=2}
Kotlarz2020	Kotlarz et al. 2020	Cross-sectional community biomonitoring	Some Concerns	Low	Low	Low	Some Concerns	Low	Some Concerns	Some Concerns	Well-designed community PFAS study, validated methods, robust adjustment, but cross-sectional, exposure misclassification, uncertain health links.	:contentReference[oaicite:3]{index=3}
Leslie2022	Leslie et al. 2022	Biomonitoring, human blood (lab-based)	Some Concerns	Low	Low	Low	Some Concerns	Low	Some Concerns	Some Concerns	First-in-human plastics exposure study, strong lab QA/QC, low N (n=22), advanced measurement, limited covariates.	:contentReference[oaicite:4]{index=4}
Li2024	Li et al. 2024	Comprehensive review	N/A	N/A	N/A	N/A	N/A	N/A	N/A	N/A	Review article – RoB not applicable; use SANRA/AMSTAR-2 if desired.	:contentReference[oaicite:5]{index=5}
Martin2021	Martin et al. 2021	Systematic review, mixture toxicology	N/A	N/A	N/A	N/A	N/A	N/A	N/A	N/A	Systematic review of mixtures, robust SR methods, not RoB applicable; protocol published, risk-of-bias tool for mixture studies included.	:contentReference[oaicite:6]{index=6}
McCord2019	McCord & Strynar 2019	Chemical monitoring/identification (PFAS, river water)	Some Concerns	Low	Some Concerns	Low	Some Concerns	Some Concerns	Some Concerns	Some Concerns	Advanced nontargeted HRMS, validated methods, possible selection bias, non-human, no direct health outcome data.	:contentReference[oaicite:7]{index=7}
Mesnage2021	Mesnage et al. 2021	Animal mechanistic/toxicology, multi-omics	High	Some Concerns	High	Low	Some Concerns	Low	N/A	High	Animal model, mechanistic, advanced omics, subchronic exposure, not generalizable, no randomisation/blinding.	:contentReference[oaicite:8]{index=8}
Middleton2025	Middleton et al. 2025	Cross-sectional exposome-wide association (NHANES, cognition)	Some Concerns	Low	Some Concerns	Low	Some Concerns	Low	Some Concerns	Some Concerns	Large US sample, robust analysis, cross-sectional, single timepoint, possible selection bias, covariate adjustment.	:contentReference[oaicite:9]{index=9}
Moschet2018	Moschet et al. 2018	Cross-sectional, environmental dust exposome study	Some Concerns	Low	Low	Low	Some Concerns	Low	Some Concerns	Some Concerns	High-res mass spec, environmental dust, targeted and nontarget screening; strong analytical validation; exposure pathways plausible; limited health outcome assessment; potential selection bias in sampling.	:contentReference[oaicite:0]{index=0}
EFSA2021	EFSA 2021 cumulative RA	Action plan/policy document	N/A	N/A	N/A	N/A	N/A	N/A	N/A	N/A	EFSA Action Plan on Cumulative Risk Assessment: regulatory/policy roadmap, not primary research; RoB not applicable.	:contentReference[oaicite:1]{index=1}
EPA2025	EPA 2025 PFAS regulation	U.S. regulatory/policy summary	N/A	N/A	N/A	N/A	N/A	N/A	N/A	N/A	U.S. EPA regulatory policy on PFAS; not a study, no RoB possible.	:contentReference[oaicite:2]{index=2}
EFSA2021b	EFSA 2021 grouping guidance	EFSA Scientific guidance	N/A	N/A	N/A	N/A	N/A	N/A	N/A	N/A	EFSA Scientific Guidance on assessment groupings for chemicals; regulatory/guidance document, not a primary study; RoB not applicable.	:contentReference[oaicite:3]{index=3}
Nadiu2021	Naidu et al. 2021	Review article	N/A	N/A	N/A	N/A	N/A	N/A	N/A	N/A	Comprehensive review of global chemical pollution and human/ecosystem health risks; not RoB eligible.	:contentReference[oaicite:4]{index=4}
Orr2018	Orr et al. 2018	Animal mechanistic/toxicology, mixture exposure	High	Some Concerns	High	Low	Some Concerns	Low	N/A	High	Wistar rat study, mixture of heavy metals, strong exposure design, analytical methods robust, limited blinding/randomization, direct health outcome assessment; not generalizable to humans.	:contentReference[oaicite:5]{index=5}
Otaru2024	Otaru et al. 2024	Cross-sectional, NHANES exposome study	Some Concerns	Low	Low	Low	Some Concerns	Low	Some Concerns	Some Concerns	Large representative US sample, urine glyphosate, strong stats/machine learning, robust confounder adjustment; possible exposure misclassification; cross-sectional.	:contentReference[oaicite:6]{index=6}
Park2022	Park et al. 2022	Birth cohort, EWAS/epigenetics (cord blood Cd)	Some Concerns	Low	Low	Low	Some Concerns	Low	Some Concerns	Some Concerns	Prospective Korean birth cohort, robust biospecimen handling, cord blood DNA methylation, adjusted for confounders, large EWAS, outcome not clinical endpoint, strong methods.	:contentReference[oaicite:7]{index=7}
PFAS_RESTR2023	PFAS restriction proposal 2023	EU regulatory/policy proposal	N/A	N/A	N/A	N/A	N/A	N/A	N/A	N/A	EU-wide PFAS restriction dossier and regulatory summary; not RoB eligible, policy document.	:contentReference[oaicite:8]{index=8}
Ragusa2022	Ragusa et al. 2022	Case series/human tissue microplastics	High	Some Concerns	Some Concerns	Low	Some Concerns	Low	N/A	High	First study of microplastics in human placenta, tissue-level microscopy, strong contamination controls, but case series, low N, not blinded/randomized, no direct health outcome, preliminary.	:contentReference[oaicite:9]{index=9}
RoadmapZero2024	Roadmap to Zero 2024	Website/policy initiative	N/A	N/A	N/A	N/A	N/A	N/A	N/A	N/A	ZDHC Foundation, fashion chemicals policy; not a primary study; RoB not applicable.	:contentReference[oaicite:0]{index=0}
Shi2022	Shi et al. 2022	Animal mechanistic, microplastics exposure	High	High	Some Concerns	Low	Some Concerns	Low	N/A	High	Mice, oral microplastic exposure, multi-organ, multi-omics; limited blinding/randomisation, strong mechanistic data, real-world dose; not human evidence.	:contentReference[oaicite:1]{index=1}
Shoaib2023	Shoaib et al. 2023	Animal mechanistic/toxicology, arsenic exposure	High	Some Concerns	High	Low	Some Concerns	Low	N/A	High	Mice, arsenic exposure, robust biochemical/metabolomics profiling, no blinding, possible allocation bias, strong analytical but not human; large sample, good randomization.	:contentReference[oaicite:2]{index=2}
Sobel2022	Sobel et al. 2022	Prospective cohort (Strong Heart Study, US adults)	Low	Low	Low	Low	Low	Low	Low	Low	Large n=2077, population-based, robust confounder adjustment, pre-specified protocol, biostatistics, outcome assessor blinding, high internal validity.	:contentReference[oaicite:3]{index=3}
Strynar2015	Strynar et al. 2015	Environmental monitoring/analytical chemistry	N/A	N/A	N/A	N/A	N/A	N/A	N/A	N/A	Analytical workflow paper: identification of novel PFAS in US waters, method development; no population or intervention; RoB not applicable.	:contentReference[oaicite:4]{index=4}
Sun2016	Sun et al. 2016	Environmental monitoring/analytical chemistry	N/A	N/A	N/A	N/A	N/A	N/A	N/A	N/A	Analytical monitoring of PFASs in water, no human/animal health outcome, no RoB possible; method validation and surveillance study.	:contentReference[oaicite:5]{index=5}
Tian2020	Tian et al. 2020	Mechanistic toxicology (coho salmon)	High	Some Concerns	High	Low	Some Concerns	Low	N/A	High	Acute toxicity of tire-derived quinone in salmon, effect-directed fractionation, strong experimental controls, high relevance for mechanism, not human data.	:contentReference[oaicite:6]{index=6}
Leonard2024	Leonard et al. 2024	Human case series (microplastics in blood)	Some Concerns	Some Concerns	Some Concerns	Low	Some Concerns	Low	Some Concerns	Some Concerns	Pilot human study (n=20), robust µFTIR analytics, strong lab controls, possible selection and detection bias, first report, limited confounder control.	:contentReference[oaicite:7]{index=7}
Viet2021	Viet et al. 2021	Review/resource description	N/A	N/A	N/A	N/A	N/A	N/A	N/A	N/A	HHEAR model, exposome infrastructure review; not a primary study, RoB not applicable.	:contentReference[oaicite:8]{index=8}
Wang2022	Wang et al. 2022	Analytical/monitoring study: drinking water	N/A	N/A	N/A	N/A	N/A	N/A	N/A	N/A	Monitoring/chemical detection study, non-human, no intervention or cohort; RoB not applicable.	:contentReference[oaicite:9]{index=9}
Wu2023	Wu et al. 2023	Cohort analysis (Bangladeshi population, FACT trial)	Low	Some Concerns	Low	Low	Low	Low	Some Concerns	Some Concerns	Non-smoking adults, robust exposure measurement, block randomization, possible selection bias due to exclusions, strong metabolomics QA/QC, outcome assessors blinded, small N, residual confounding.	:contentReference[oaicite:0]{index=0}
Xie2021	Xie et al. 2021	Animal mechanistic (mouse, PFAS exposure)	High	Some Concerns	High	Some Concerns	Some Concerns	Low	N/A	High	Oral exposure to HFPO-DA, well-controlled, multi-dose, good statistical reporting, no randomization/blinding, outcome data complete, high internal validity for mechanism, no human data.	:contentReference[oaicite:1]{index=1}
Yu2025	Yu et al. 2025	Environmental monitoring/analytical chemistry	N/A	N/A	N/A	N/A	N/A	N/A	N/A	N/A	Comprehensive WWTP pharmaceutical/TP screening, high-res MS, no intervention or health outcome, RoB not applicable; strong QA/QC, fit for exposure mapping, not RoB.	:contentReference[oaicite:2]{index=2}
Zhang2019	Zhang et al. 2019	Environmental chemistry/method development	N/A	N/A	N/A	N/A	N/A	N/A	N/A	N/A	PFAS fate and method development, no population or animal exposure/outcome, not eligible for RoB.	:contentReference[oaicite:3]{index=3}
Zhang2022	Zhang et al. 2022	In vitro toxicology (cell lines, BFRs, molecular/functional)	Some Concerns	Some Concerns	High	Some Concerns	Some Concerns	Low	N/A	High	Robust cell-based dual-luciferase, relevant human cell lines, mechanistic, limited real-world relevance, strong replicates/statistics, selective outcome reporting risk moderate.	:contentReference[oaicite:4]{index=4}
Zhao2021	Zhao et al. 2021	Human cross-sectional (serum NBFRs, China)	Some Concerns	Low	Some Concerns	Low	Low	Low	Some Concerns	Some Concerns	Large sample, representative, well-controlled, population based, strong exposure measurement, residual confounding (diet/lifestyle), biomarker-outcome cross-sectional, risk of reverse causality.	:contentReference[oaicite:5]{index=5}
Ziegler2020	Ziegler et al. 2020	Animal mechanistic (brown trout, citalopram)	Some Concerns	Some Concerns	Some Concerns	Low	Low	Low	N/A	Some Concerns	Controlled multi-life-stage fish model, full transparency, good QA/QC, blinding unclear, well reported but mechanistic only.	:contentReference[oaicite:6]{index=6}
3M2022	3M Company 2022	Corporate policy/industry announcement	N/A	N/A	N/A	N/A	N/A	N/A	N/A	N/A	3M press release: PFAS manufacturing exit policy, not a study, RoB not applicable; evidence for exposome mapping only.	:contentReference[oaicite:7]{index=7}

## Sheet: Evidence_map
StudyID	Citation	ContaminantClass	HealthOutcome	Country
Agrawal2025	Agrawal et al. 2025	Pesticides	Metabolic	India
Arora2017	Arora et al. 2017	Metals	Developmental	Sweden
Bart2022	Bart et al. 2022	Pesticides	HTS In Vitro	France
Bart2022	Bart et al. 2022	Metals	HTS In Vitro	France
Bois2017	Bois et al. 2017	Mixtures	HTS In Vitro	France
Boyer2023	Boyer et al. 2023	Metals	Metabolic	USA
Boyer2023	Boyer et al. 2023	Pesticides	Metabolic	USA
Boyer2023	Boyer et al. 2023	Mixtures	Metabolic	USA
Bozack2021	Bozack et al. 2021	Metals	Epigenetic	USA
Chao2022	Chao et al. 2022	PFAS	Metabolic	China
Chao2022	Chao et al. 2022	PPCPs	Metabolic	China
Ding2024	Ding et al. 2024	Metals	Metabolic	China
Ding2024	Ding et al. 2024	PPCPs	Metabolic	China
Ding2024	Ding et al. 2024	Mixtures	Metabolic	China
Domingo2024	Domingo-Relloso et al. 2024	Metals	Metabolic	USA
Donald2016	Donald et al. 2016	Pesticides	Other	Senegal
Donald2016	Donald et al. 2016	Mixtures	Other	Senegal
Fox2021	Fox et al. 2021	Pesticides	Metabolic	USA
Godbole2024	Godbole et al. 2024	Metals	Metabolic	USA
Godbole2024	Godbole et al. 2024	PPCPs	Metabolic	USA
Gould2024	Gould et al. 2024	Flame Retardants	Developmental	USA
Hu2021	Hu et al. 2021	Pesticides	Metabolic	China
Jenner2022	Jenner et al. 2022	Microplastics	Other	UK
Johnson2025	Johnson et al. 2025	PFAS	Reproductive	USA
Johnson2025	Johnson et al. 2025	PPCPs	Reproductive	USA
Johnson2025	Johnson et al. 2025	Mixtures	Reproductive	USA
Kessing2017	Kessing et al. 2017	Pesticides	Developmental	Denmark
Khodasevich2025	Khodasevich et al. 2025	PFAS	Metabolic	USA
Khodasevich2025	Khodasevich et al. 2025	Metals	Metabolic	USA
Khodasevich2025	Khodasevich et al. 2025	Mixtures	Metabolic	USA
Kotlarz2020	Kotlarz et al. 2020	PFAS	Metabolic	USA
Leslie2022	Leslie et al. 2022	Microplastics	Other	Netherlands
McCord2019	McCord & Strynar 2019	PFAS	Other	USA
Mesnage2021	Mesnage et al. 2021	Pesticides	Metabolic	UK
Middleton2025	Middleton et al. 2025	Metals	Neurologic	USA
Moschet2018	Moschet et al. 2018	Flame Retardants	Other	Switzerland
Moschet2018	Moschet et al. 2018	Other	Other	Switzerland
Otaru2024	Otaru et al. 2024	Pesticides	Metabolic	USA
Orr2018	Orr et al. 2018	Metals	Developmental	UK
Park2022	Park et al. 2022	Metals	Epigenetic	South Korea
Ragusa2022	Ragusa et al. 2022	Microplastics	Other	Italy
Shi2022	Shi et al. 2022	Microplastics	Developmental	China
Shoaib2023	Shoaib et al. 2023	Metals	Metabolic	Pakistan
Shoaib2023	Shoaib et al. 2023	Pesticides	Metabolic	Pakistan
Sobel2022	Sobel et al. 2022	Metals	Metabolic	USA
Tian2020	Tian et al. 2020	Mixtures	HTS In Vitro	USA
Leonard2024	Leonard et al. 2024	Microplastics	Other	Netherlands
Wu2023	Wu et al. 2023	Pesticides	Metabolic	Bangladesh
Wu2023	Wu et al. 2023	Mixtures	Metabolic	Bangladesh
Xie2021	Xie et al. 2021	PFAS	Immune	USA
Zhang2022	Zhang et al. 2022	Flame Retardants	HTS In Vitro	China
Zhao2021	Zhao et al. 2021	Flame Retardants	Metabolic	China
Zhao2021	Zhao et al. 2021	Metals	Metabolic	China
Ziegler2020	Ziegler et al. 2020	PPCPs	Developmental	Germany
Conley2021	Conley et al. 2021	PFAS	Developmental	USA
Conley2021	Conley et al. 2021	PFAS	Metabolic	USA
Huo2016	Huo et al. 2016	Other	Developmental	China
Huo2016	Huo et al. 2016	Other	Epigenetic	China
Liu2019	Liu et al. 2019	Other	Metabolic	USA
Choi2023	Choi et al. 2023	Mixtures	Metabolic	South Korea
Yang2024	Yang et al. 2024	VOCs	Reproductive	USA

## Sheet: Full_citation
Agrawal, M., Ungaro, R.C., Rajauria, P., Magee, J., Petrick, L., Midya, V., Colombel, J.-F., Valvi, D., Maroli, A.S., Pinto-Pacheco, B., Torres, J., Petralia, F., Walker, D.I., Porter, C., McNeil, B., Eggers, J., Torres-Olascoaga, L.A., Lane, J.M., Andra, S.S., Gennings, C., Téllez-Rojo, M.M., Wright, R.O., Arora, M., Rosa, M.J., Alcala, C.S., Eggers, S., 2025. High serum pesticide levels are ass…
Ankley, G., Escher, B.I., Hartung, T., Shah, I., 2016. Pathway-based approaches for Environmental Monitoring and risk assessment. Environmental Science &amp; Technology 50, 10295–10296. doi:10.1021/acs.est.6b04425
Arora, M., Reichenberg, A., Willfors, C., Austin, C., Gennings, C., Berggren, S., Lichtenstein, P., Anckarsäter, H., Tammimies, K., Bölte, S., 2017. Fetal and postnatal metal dysregulation in autism. Nature Communications 8. doi:10.1038/ncomms15493
Assembly, U.N.E., 2022. 5/14. end plastic pollution: Towards an international legally binding instrument - resolution adopted by the United Nations Environment Assembly on 2 March 2022 [UNEP/EA.5/Res.14] [WWW Document]. UN Environment Document Repository Home. URL https://wedocs.unep.org/handle/20.500.11822/40597 (accessed 4.18.25).
Bart, S., Short, S., Jager, T., Eagles, E.J., Robinson, A., Badder, C., Lahive, E., Spurgeon, D.J., Ashauer, R., 2022. How to analyse and account for interactions in mixture toxicity with toxicokinetic-toxicodynamic models. Science of The Total Environment 843, 157048. doi:10.1016/j.scitotenv.2022.157048
Bois, F.Y., Golbamaki-Bakhtyari, N., Kovarich, S., Tebby, C., Gabb, H.A., Lemazurier, E., 2017. High-throughput analysis of ovarian cycle disruption by mixtures of aromatase inhibitors. Environmental Health Perspectives 125. doi:10.1289/ehp742
Boyer, K., Domingo-Relloso, A., Jiang, E., Haack, K., Goessler, W., Zhang, Y., Umans, J.G., Belsky, D.W., Cole, S.A., Navas-Acien, A., Kupsco, A., 2023. Metal mixtures and DNA methylation measures of biological aging in American Indian populations. Environment International 178, 108064. doi:10.1016/j.envint.2023.108064
Bozack, A.K., Rifas-Shiman, S.L., Coull, B.A., Baccarelli, A.A., Wright, R.O., Amarasiriwardena, C., Gold, D.R., Oken, E., Hivert, M.-F., Cardenas, A., 2021. Prenatal metal exposure, cord blood DNA methylation and persistence in childhood: An epigenome-wide association study of 12 metals. Clinical Epigenetics 13. doi:10.1186/s13148-021-01198-z
Browne, P., Paul Friedman, K., Boekelheide, K., Thomas, R.S., 2024. Adverse effects in traditional and alternative toxicity tests. Regulatory Toxicology and Pharmacology 148, 105579. doi:10.1016/j.yrtph.2024.105579
Chao, A., Grossman, J., Carberry, C., Lai, Y., Williams, A.J., Minucci, J.M., Thomas Purucker, S., Szilagyi, J., Lu, K., Boggess, K., Fry, R.C., Sobus, J.R., Rager, J.E., 2022. Integrative exposomic, transcriptomic, epigenomic analyses of human placental samples links understudied chemicals to preeclampsia. Environment International 167, 107385. doi:10.1016/j.envint.2022.107385
Chemicals strategy for sustainability: Towards a toxic-free environment [WWW Document], n.d. . European Sources Online. URL https://www.europeansources.info/record/chemicals-strategy-for-sustainability-towards-a-toxic-free-environment/ (accessed 4.18.25).
CLP regulation: New hazard classes, 2024. . Focus on Powder Coatings 2024, 1–2. doi:10.1016/j.fopow.2024.02.003
Commission regulation (EU) 2023/2055 - restriction of microplastics intentionally added to products [WWW Document], n.d. . Internal Market, Industry, Entrepreneurship and SMEs. URL https://single-market-economy.ec.europa.eu/sectors/chemicals/reach/restrictions/commission-regulation-eu-20232055-restriction-microplastics-intentionally-added-products_en (accessed 4.18.25).
Ding, E., Deng, F., Fang, J., Liu, J., Yan, W., Yao, Q., Miao, K., Wang, Y., Sun, P., Li, C., Liu, Y., Dong, H., Dong, L., Zhang, X., Lu, Y., Lin, X., Ding, C., Li, T., Shi, Y., Cai, Y., Liu, X., Godri Pollitt, K.J., Ji, J.S., Tong, S., Tang, S., Shi, X., 2024. Exposome-wide ranking to uncover environmental chemicals associated with dyslipidemia: A panel study in healthy older Chinese adults from…
Domingo-Relloso, A., McGraw, K.E., Heckbert, S.R., Luchsinger, J.A., Schilling, K., Glabonjat, R.A., Martinez-Morata, I., Mayer, M., Liu, Y., Wood, A.C., Goldsmith, J., Hayden, K.M., Habes, M., Nasrallah, I.M., Bryan, R.N., Rashid, T., Post, W.S., Rotter, J.I., Palta, P., Valeri, L., Hughes, T.M., Navas-Acien, A., 2024. Urinary metal levels, cognitive test performance, and dementia in the multi-e…
Donald, C.E., Scott, R.P., Blaustein, K.L., Halbleib, M.L., Sarr, M., Jepson, P.C., Anderson, K.A., 2016. Silicone wristbands detect individuals’ pesticide exposures in West Africa. Royal Society Open Science 3, 160433. doi:10.1098/rsos.160433
Environment, U., n.d. Global monitoring of Persistent Organic Pollutants [WWW Document]. UNEP. URL https://www.unep.org/topics/pollution-and-health/persistent-organic-pollutants-pops/global-monitoring-persistent-organic (accessed 4.18.25).
Fox, J., Macaluso, F., Moore, C., Mesenbring, E., Johnson, R.J., Hamman, R.F., James, K.A., 2021. Urine tungsten and chronic kidney disease in rural Colorado. Environmental Research 195, 110710. doi:10.1016/j.envres.2021.110710
Fraiha-Pegado, J., de Paula, V.J., Alotaibi, T., Forlenza, O., Hajek, T., 2024. Trace lithium levels in drinking water and risk of dementia: A systematic review. International Journal of Bipolar Disorders 12. doi:10.1186/s40345-024-00348-5
Godbole, A.M., Chen, A., Vuong, A.M., 2024. Associations between neonicotinoids and liver function measures in US adults: National Health and Nutrition Examination Survey 2015–2016. Environmental Epidemiology 8. doi:10.1097/ee9.0000000000000310
Gould, S.L., Winter, M.J., Trznadel, M., Lange, A., Hamilton, C.M., Boreham, R.J., Hetheridge, M.J., Young, A., Norton, W.H., Tyler, C.R., 2024. Exposure effects of environmentally relevant concentrations of the tricyclic antidepressant amitriptyline in early life stage zebrafish. Environmental Science &amp; Technology. doi:10.1021/acs.est.3c08126
Home [WWW Document], n.d. . HBM4EU. URL https://www.hbm4eu.eu/the-project/ (accessed 4.18.25).
Hopkins, Z.R., Sun, M., DeWitt, J.C., Knappe, D.R.U., 2018. Recently detected drinking water contaminants: Genx and other per‐ and polyfluoroalkyl ether acids. Journal AWWA 110, 13–28. doi:10.1002/awwa.1073
Hu, J., Lesseur, C., Miao, Y., Manservisi, F., Panzacchi, S., Mandrioli, D., Belpoggi, F., Chen, J., Petrick, L., 2021. Hu . Scientific Reports 11. doi:10.1038/s41598-021-82552-2
The Human Exposome Project: A Toolbox for assessing and addressing the impact of environment on health: Programme: H2020: Cordis: European Commission [WWW Document], n.d. . CORDIS. URL https://cordis.europa.eu/programme/id/H2020_SC1-BHC-28-2019 (accessed 4.18.25).
Implementing decision - 2022/1307 - en - EUR-lex [WWW Document], n.d. . EUR. URL https://eur-lex.europa.eu/eli/dec_impl/2022/1307/oj/eng (accessed 4.18.25a).
ISGlobal, 2024. Workshop series: Multi-omics Data Integration in human exposome studies [WWW Document]. ISGLOBAL. URL https://www.isglobal.org/-/multiomics-exposome-workshop?utm_source=chatgpt.com (accessed 4.18.25).
Jenner, L.C., Rotchell, J.M., Bennett, R.T., Cowen, M., Tentzeris, V., Sadofsky, L.R., 2022. Detection of microplastics in human lung tissue using μftir spectroscopy. Science of The Total Environment 831, 154907. doi:10.1016/j.scitotenv.2022.154907
Johnson, T.A., Adelman, S., Najari, B.B., Robinson, J.F., Kahn, L.G., Abrahamsson, D., 2024. Non-targeted analysis of environmental contaminants and their associations with semen health factors in men from New York City. Environment &amp; Health 3, 164–176. doi:10.1021/envhealth.4c00165
Kessing, L.V., Gerds, T.A., Knudsen, N.N., Jørgensen, L.F., Kristiansen, S.M., Voutchkova, D., Ernstsen, V., Schullehner, J., Hansen, B., Andersen, P.K., Ersbøll, A.K., 2017. Association of Lithium in drinking water with the incidence of dementia. JAMA Psychiatry 74, 1005. doi:10.1001/jamapsychiatry.2017.2362
Khodasevich, D., Gladish, N., Daredia, S., Bozack, A.K., Shen, H., Nwanaji-Enwerem, J.C., Needham, B.L., Rehkopf, D.H., Cardenas, A., 2025. Exposome-wide association study of Environmental Chemical Exposures and epigenetic aging in the National Health and Nutrition Examination Survey. Aging. doi:10.18632/aging.206201
Kotlarz, N., McCord, J., Collier, D., Lea, C.S., Strynar, M., Lindstrom, A.B., Wilkie, A.A., Islam, J.Y., Matney, K., Tarte, P., Polera, M.E., Burdette, K., DeWitt, J., May, K., Smart, R.C., Knappe, D.R.U., Hoppin, J.A., 2020. Measurement of novel, drinking water-associated pfas in blood from adults and children in Wilmington, North Carolina. Environmental Health Perspectives 128. doi:10.1289/ehp…
Leslie, H.A., van Velzen, M.J.M., Brandsma, S.H., Vethaak, A.D., Garcia-Vallejo, J.J., Lamoree, M.H., 2022. Discovery and quantification of plastic particle pollution in human blood. Environment International 163, 107199. doi:10.1016/j.envint.2022.107199
Li, X., Shen, X., Jiang, W., Xi, Y., Li, S., 2024. Comprehensive review of emerging contaminants: Detection Technologies, environmental impact, and management strategies. Ecotoxicology and Environmental Safety 278, 116420. doi:10.1016/j.ecoenv.2024.116420
Martin, O., Scholze, M., Ermler, S., McPhie, J., Bopp, S.K., Kienzler, A., Parissis, N., Kortenkamp, A., 2021. Ten Years of research on synergisms and antagonisms in chemical mixtures: A systematic review and quantitative reappraisal of mixture studies. Environment International 146, 106206. doi:10.1016/j.envint.2020.106206
McCord, J., Strynar, M., 2019. Identification of per- and polyfluoroalkyl substances in the cape fear river by high resolution mass spectrometry and nontargeted screening. Environmental Science &amp; Technology 53, 4717–4727. doi:10.1021/acs.est.8b06017
Mesnage, R., Teixeira, M., Mandrioli, D., Falcioni, L., Ibragim, M., Ducarmon, Q.R., Zwittink, R.D., Amiel, C., Panoff, J.-M., Bourne, E., Savage, E., Mein, C.A., Belpoggi, F., Antoniou, M.N., 2021. Multi-omics phenotyping of the gut-liver axis reveals metabolic perturbations from a low-dose pesticide mixture in rats. Communications Biology 4. doi:10.1038/s42003-021-01990-w
Microbead-Free Waters Act of 2015 (2015 - H.R. 1321) [WWW Document], n.d. . GovTrack.us. URL https://www.govtrack.us/congress/bills/114/hr1321 (accessed 4.18.25).
Middleton, L.Y., Walker, E., Cockell, S., Dou, J., Nguyen, V.K., Schrank, M., Patel, C.J., Ware, E.B., Colacino, J.A., Park, S.K., Bakulski, K.M., 2025. Exposome-wide association study of cognition among older adults in the National Health and Nutrition Examination Survey. Exposome 5. doi:10.1093/exposome/osaf002
Moschet, C., Anumol, T., Lew, B.M., Bennett, D.H., Young, T.M., 2018. Household dust as a repository of chemical accumulation: New Insights from a comprehensive high-resolution mass Spectrometric Study. Environmental Science &amp; Technology 52, 2878–2887. doi:10.1021/acs.est.7b05767
N.d. . EFSA-Sante Action Plan on cumulative risk assessment ... URL https://food.ec.europa.eu/system/files/2021-03/pesticides_mrl_cum-risk-ass_action-plan.pdf (accessed 4.18.25a).
N.d. . EPA. URL https://www.epa.gov/sdwa/and-polyfluoroalkyl-substances-pfas (accessed 4.18.25).
N.d. . Guidance document on scientific criteria for grouping chemicals into assessment groups for human risk assessment of combined exposure to multiple chemicals - - 2021 - EFSA journal - wiley online library. URL https://efsa.onlinelibrary.wiley.com/doi/10.2903/j.efsa.2021.7033 (accessed 4.18.25b).
Naidu, R., Biswas, B., Willett, I.R., Cribb, J., Kumar Singh, B., Paul Nathanail, C., Coulon, F., Semple, K.T., Jones, K.C., Barclay, A., Aitken, R.J., 2021. Chemical pollution: A growing peril and potential catastrophic risk to humanity. Environment International 156, 106616. doi:10.1016/j.envint.2021.106616
Orr, S.E., Barnes, M.C., George, H.S., Joshee, L., Jeon, B., Scircle, A., Black, O., Cizdziel, J.V., Smith, B.E., Bridges, C.C., 2018. Exposure to mixtures of mercury, cadmium, lead, and arsenic alters the disposition of single metals in tissues of Wistar rats. Journal of Toxicology and Environmental Health, Part A 81, 1246–1256. doi:10.1080/15287394.2018.1551164
Otaru, S., Jones, L.E., Carpenter, D.O., 2024. . Associations between urine glyphosate levels and metabolic health risks: Insights from a large cross-sectional population-based study. doi:10.21203/rs.3.rs-4272811/v1
Park, J., Kim, J., Kim, E., Won, S., Kim, W.J., 2022. Association between prenatal cadmium exposure and cord blood DNA methylation. Environmental Research 212, 113268. doi:10.1016/j.envres.2022.113268
Pfas restriction proposal on the EU level [WWW Document], n.d. . Gleiss Lutz. URL https://www.gleisslutz.com/en/news-events/know-how/pfas-restriction-proposal-eu-level (accessed 4.18.25).
Ragusa, A., Matta, M., Cristiano, L., Matassa, R., Battaglione, E., Svelato, A., De Luca, C., D’Avino, S., Gulotta, A., Rongioletti, M.C., Catalano, P., Santacroce, C., Notarstefano, V., Carnevali, O., Giorgini, E., Vizza, E., Familiari, G., Nottola, S.A., 2022. Deeply in plasticenta: Presence of microplastics in the intracellular compartment of human placentas. International Journal of Environme…
Ragusa, A., Svelato, A., Santacroce, C., Catalano, P., Notarstefano, V., Carnevali, O., Papa, F., Rongioletti, M.C., Baiocco, F., Draghi, S., D’Amore, E., Rinaldo, D., Matta, M., Giorgini, E., 2021. Plasticenta: First evidence of microplastics in human placenta. Environment International 146, 106274. doi:10.1016/j.envint.2020.106274
Regulation - 2018/605 - en - EUR-lex [WWW Document], n.d. . EUR. URL https://eur-lex.europa.eu/legal-content/EN/TXT/?uri=CELEX%3A32018R0605 (accessed 4.18.25b).
Safer chemistry practices [WWW Document], n.d. . Roadmap to Zero. URL https://www.roadmaptozero.com/post/safer-chemistry-practices?utm_source=chatgpt.com (accessed 4.18.25).
Shi, C., Han, X., Guo, W., Wu, Q., Yang, X., Wang, Y., Tang, G., Wang, S., Wang, Z., Liu, Y., Li, M., Lv, M., Guo, Y., Li, Z., Li, J., Shi, J., Qu, G., Jiang, G., 2022. Disturbed gut-liver axis indicating oral exposure to polystyrene microplastic potentially increases the risk of insulin resistance. Environment International 164, 107273. doi:10.1016/j.envint.2022.107273
Shoaib, S.M., Afzal, S., Feezan, A., Akash, M.S., Nadeem, A., Mir, T.M., 2023. Metabolomics analysis and biochemical profiling of arsenic-induced metabolic impairment and disease susceptibility. Biomolecules 13, 1424. doi:10.3390/biom13091424
Sobel, M., Navas-Acien, A., Powers, M., Grau-Perez, M., Goessler, W., Best, L.G., Umans, J., Oelsner, E.C., Podolanczuk, A., Sanchez, T.R., 2022. Environmental-level exposure to metals and metal-mixtures associated with spirometry-defined lung disease in American Indian adults: Evidence from the Strong Heart Study. Environmental Research 207, 112194. doi:10.1016/j.envres.2021.112194
Strynar, M., Dagnino, S., McMahen, R., Liang, S., Lindstrom, A., Andersen, E., McMillan, L., Thurman, M., Ferrer, I., Ball, C., 2015. Identification of novel perfluoroalkyl ether carboxylic acids (pfecas) and sulfonic acids (pfesas) in natural waters using accurate mass time-of-flight mass spectrometry (TOFMS). Environmental Science &amp; Technology 49, 11622–11630. doi:10.1021/acs.est.5b01215
Sun, M., Arevalo, E., Strynar, M., Lindstrom, A., Richardson, M., Kearns, B., Pickett, A., Smith, C., Knappe, D.R., 2016. Legacy and emerging perfluoroalkyl substances are important drinking water contaminants in the cape fear river watershed of North Carolina. Environmental Science &amp; Technology Letters 3, 415–419. doi:10.1021/acs.estlett.6b00398
Tian, Z., Zhao, H., Peter, K.T., Gonzalez, M., Wetzel, J., Wu, C., Hu, X., Prat, J., Mudrock, E., Hettinger, R., Cortina, A.E., Biswas, R.G., Kock, F.V., Soong, R., Jenne, A., Du, B., Hou, F., He, H., Lundeen, R., Gilbreath, A., Sutton, R., Scholz, N.L., Davis, J.W., Dodd, M.C., Simpson, A., McIntyre, J.K., Kolodziej, E.P., 2021. A ubiquitous tire rubber–derived chemical induces acute mortality i…
V. L. Leonard, S., Liddle, C.R., Atherall, C.A., Chapman, E., Watkins, M., D. J. Calaminus, S., Rotchell, J.M., 2024. Microplastics in human blood: Polymer types, concentrations and characterisation using μftir. Environment International 188, 108751. doi:10.1016/j.envint.2024.108751
Viet, S.M., Falman, J.C., Merrill, L.S., Faustman, E.M., Savitz, D.A., Mervish, N., Barr, D.B., Peterson, L.A., Wright, R., Balshaw, D., O’Brien, B., 2021. Human health exposure analysis resource (HHEAR): A model for incorporating the exposome into Health Studies. International Journal of Hygiene and Environmental Health 235, 113768. doi:10.1016/j.ijheh.2021.113768
Wang, F., Wang, Fang, Xiang, Leilei, Sze-Yin Leung, Kelvin, Elsner, Martin, Zhang, Ying, Guo, Yuming, Pan, Bo, Sun, Hongwen, An, Taicheng, Ying, Guangguo, Brooks, Bryan, Hou, Deyi, Helbling, Damian, Sun, Jianqiang, Qiu, Hao, Vogel, Timothy, Tiedje, James, 2024. Emerging contaminants: A one health perspective. eScholarship, University of California.
Wang, Y.-Q., Hu, L.-X., Zhao, J.-H., Han, Y., Liu, Y.-S., Zhao, J.-L., Yang, B., Ying, G.-G., 2022. Suspect, non-target and target screening of pharmaceuticals and Personal Care Products (ppcps) in a drinking water system. Science of The Total Environment 808, 151866. doi:10.1016/j.scitotenv.2021.151866
Wu, H., Kalia, V., Niedzwiecki, M.M., Kioumourtzoglou, M.-A., Pierce, B., Ilievski, V., Goldsmith, J., Jones, D.P., Navas-Acien, A., Walker, D.I., Gamble, M.V., 2023. Metabolomic changes associated with chronic arsenic exposure in a Bangladeshi population. Chemosphere 320, 137998. doi:10.1016/j.chemosphere.2023.137998
Xie, X., Zhou, J., Hu, L., Shu, R., Zhang, M., Xiong, Z., Wu, F., Fu, Z., 2021. Exposure to hexafluoropropylene oxide dimer acid (HFPO-DA) disturbs the gut barrier function and gut microbiota in mice. Environmental Pollution 290, 117934. doi:10.1016/j.envpol.2021.117934
Yu, L., Lin, Y., Li, J., Deng, C., Zhang, R., Liu, A., Wang, L., Li, Y., Wei, X., Lu, D., Gao, W., Zheng, Y., 2025. Suspect screening of pharmaceuticals and their transformation products (TPS) in wastewater during COVID-19 infection peak: Identification of new TPS and elevated risks. Environmental Science &amp; Technology 59, 4893–4905. doi:10.1021/acs.est.5c00125
Zhang, C., Hopkins, Z.R., McCord, J., Strynar, M.J., Knappe, D.R., 2019. Fate of per- and polyfluoroalkyl ether acids in the total oxidizable precursor assay and implications for the analysis of impacted water. Environmental Science &amp; Technology Letters 6, 662–668. doi:10.1021/acs.estlett.9b00525
Zhang, Q., Gu, S., Yu, C., Cao, R., Xu, Y., Fu, L., Wang, C., 2022. Integrated assessment of endocrine disrupting potential of four novel brominated flame retardants. Ecotoxicology and Environmental Safety 232, 113206. doi:10.1016/j.ecoenv.2022.113206
Zhao, X., Chen, T., Yang, B., Wang, D., Sun, W., Wang, Y., Yang, X., Wen, S., Li, J., Shi, Z., 2021. Serum levels of novel brominated flame retardants (NBFRs) in residents of a major BFR-producing region: Occurrence, impact factors and the relationship to thyroid and liver function. Ecotoxicology and Environmental Safety 208, 111467. doi:10.1016/j.ecoenv.2020.111467
Ziegler, M., Knoll, S., Köhler, H.-R., Tisler, S., Huhn, C., Zwiener, C., Triebskorn, R., 2020. Impact of the antidepressant citalopram on the behaviour of two different life stages of brown trout. PeerJ 8. doi:10.7717/peerj.8765
3M to Exit Pfas Manufacturing by the end of 2025 [WWW Document]. 3M News Center. URL https://news.3m.com/2022-12-20-3M-to-Exit-PFAS-Manufacturing-by-the-End-of-2025 (accessed 4.18.25).

## Sheet: Harmonized Table
Compound	Source	Method	Population.Studied	Key.Health.Effect	Regulatory.Status	Reference	PopulationType	ContaminantClass	StudyID
Tungsten	Industrial emissions	Population biomonitoring	Human (occupational)	Tungsten exposure accelerates the onset of chronic kidney disease.	Not regulated under EU or WHO drinking water standards	Fox et al., 2016	Human	Heavy metals	Fox2021
Lead (Pb)	Legacy pollution (e.g., paint, industry)	Time-resolved biomarker (LA-ICP-MS of baby teeth)	Children	Increased risk of autism and neurodevelopmental disruption	Strictly regulated worldwide in water, paint, and consumer products	Arora et al., 2017	Human	Heavy metals	Arora2017
GenX (HFPO-DA)	PFAS substitute used in fluoropolymer production	HRMS-NTA (water and serum)	Rat	Liver hypertrophy and developmental toxicity	Listed as SVHC in EU; advisory levels in US	Conley et al., 2021	Rat	PFAS	Conley2021
Halobenzoquinones (HBQs)	Water disinfection byproducts	Non-targeted HRMS	Drinking water; in vitro cell models	High cytotoxicity and DNA damage	Currently unregulated	Wu et al., 2021	In vitro	Other	Wu2023
Oxybenzone (BP-3)	UV filter in personal care products	Biomonitoring (urine, blood)	Pregnant women and infants	Associated with Hirschsprung’s disease, lower birth weight, and preterm birth	Regulated in some regions such as EU and parts of US but still widely used globally in sunscreens	Huo et al., 2016	Human	PCPPs	Huo2016
Glyphosate	Glyphosate-based herbicides (Roundup)	Urine LC-HRMS metabolomics + gut microbiome profiling	Rat dams & pups; adult rats	Disruption of host metabolism, gut microbiota, and liver function	Approved globally with ongoing scrutiny	Hu et al., 2021; Otaru et al., 2024	Human, Rat	Pesticides	Hu2021
Microplastics (<5 mm)	Ubiquitous environmental pollution	Wide-scope screening (?-FTIR, Py-GC/MS, HRMS in some contexts)	General population (Human)	Linked with obesity, insulin resistance, metabolic syndrome	Global treaty under UNEA negotiation; limited national bans	Shi et al., 2022; Leslie et al., 2022	Human	Microplastics	Shi2022
Bisphenol S (BPS)	BPA substitute in plastics	Urine biomonitoring, in vivo assays	Humans (NHANES adults & youth); mice	Hormone disruption; linked to obesity and adipose dysfunction	Limited regulation (e.g., food-contact materials, baby products)	Liu et al., 2019	Human, Rat	EDCs	Liu2019
Fluorene (PAH)	Combustion byproduct (vehicle exhaust)	Urinary biomonitoring (LC–MS)	Adolescents (Korean cohort)	Elevated liver enzymes and increased risk of fatty liver disease	Monitored but lacks enforceable exposure limits	Choi et al., 2023	Human	Other	Choi2023
o-Hydroxybiphenyl	Fungicidal pesticide used in fruit farming	Untargeted GC–HRMS (serum)	Human (pre-IBD cohort)	Detected before IBD diagnosis; associated with gut inflammation	Regulated in cosmetics, but remains widely approved for agricultural and industrial use	Agrawal et al., 2025	Human	Pesticides	Agrawal2025
Triphenyl phosphate (TPHP)	Organophosphate flame retardant	Exposome-wide lipidomics	General population (NHANES cohort, USA)	Altered lipid profiles; associated with increased adiposity	Restricted in children's products in some regions; otherwise widely used	Ding et al., 2024	Human	Flame retardants	Ding2024
Imidacloprid	Systemic neonicotinoid insecticide	EWAS (serum metabolomics)	Human (NHANES cohort)	Linked to altered liver enzyme activity	Globally regulated under pesticide laws	Godbole et al., 2024	Human	Pesticides	Godbole2024
Dibutyl Phthalate (DBP)	Plasticizer in cosmetics and personal care products	Non-targeted LC–HRMS in semen	Human (adult males)	Reduced sperm motility and overall semen quality	Restricted in EU and US consumer products	Johnson et al., 2024	Human	EDCs	Johnson2025
2-Aminophenol	Hair dye component	Non-targeted LC–HRMS in semen	Human (adult males)	Negatively associated with sperm motility	General chemical safety regulations (e.g., REACH), not specifically listed	Johnson et al., 2024	Human	EDCs	Johnson2025
4-Nitrophenol	Pesticide degradation product and paraben metabolite	Non-targeted LC–HRMS in semen	Human (adult males)	Reduced normal sperm morphology and sperm quality	Not approved for use in plant protection; no MRLs set	Johnson et al., 2024	Human	EDCs	Johnson2025
3-Hydroxyoctanedioic acid	Additive in cosmetics and fragrances	Non-targeted LC–HRMS in semen	Human (adult males)	Newly identified contaminant; reduced sperm motility and abnormal morphology	Unregulated; not listed in major chemical inventories	Johnson et al., 2024	Human	PCPPs	Johnson2025

## Sheet: Schymanski level_Orthogonal
study_id	year	target_compound	matrix	method	source_type	schymanski_level	orthogonal_confirmation	orthogonal_lines	rationale	audit_pointer
Arora_2017_NatCommun	2017	Lead (Pb)	Deciduous teeth (dentine)	LA-ICPMS	elemental	NA	NA	NA	Elemental profiling; Schymanski applies to molecular HRMS.	Methods
Fox_2021_EnvironRes	2021	Tungsten (W)	Urine	ICP-MS (targeted)	elemental	NA	NA	NA	Elemental biomonitoring; not applicable.	Methods
Leslie_2022_EnvInt	2022	Microplastics (PET, PE, PS, PMMA)	Human whole blood	GC/MS (incl. reactive pyrolysis)	polymer	NA	NA	NA	Polymer mass via pyrolysis; not smallâ€‘molecule IDs.	Methods
Shi_2022_EnvInt	2022	Microplastics (polystyrene)	Mouse liver/colon	SEM, FTIR, zeta potential (particle characterization)	polymer	NA	NA	NA	Polymer characterization; Schymanski not applicable.	Methods
Conley_2021_EnvironInt	2021	HFPODA (GenX)	Rat serum & liver	UPLC-ESI MS/MS (QqQ, MRM; 13C3â€‘IS)	targeted	Level 1	TRUE	RT + MS/MS vs authentic standard	Sameâ€‘method standard confirmation.	Methods
Huo_2016_Chemosphere	2016	Benzophenone	Maternal urine	UHPLC-MS/MS (MRM) after deconjugation	targeted	Level 1	TRUE	RT + product ions vs standard	Targeted MRM with standard.	Methods
Liu_2019	2019	Bisphenol A (BPA)	Urine (NHANES 2013â€“2014)	Online SPE-HPLC-MS/MS (CDC)	targeted	Level 1	TRUE	Isotope dilution; RT + transitions	CDC targeted quant with standards.	Methods
Liu_2019	2019	Bisphenol S (BPS)	Urine (NHANES 2013â€“2014)	Online SPE-HPLC-MS/MS (CDC)	targeted	Level 1	TRUE	Isotope dilution; RT + transitions	CDC targeted quant with standards.	Methods
Liu_2019	2019	Bisphenol F (BPF)	Urine (NHANES 2013â€“2014)	Online SPE-HPLC-MS/MS (CDC)	targeted	Level 1	TRUE	Isotope dilution; RT + transitions	CDC targeted quant with standards.	Methods
Choi_2023	2023	Hydroxyfluorene (fluorene metabolite)	Urine (Korean adolescents)	GC-MS (PAH metabolites)	targeted	Level 1	TRUE	Calibration vs standards; RT match	Targeted GCâ€‘MS quant with standards.	Methods Â§2.2
Ding_2024_EHP_BAPE	2024	Triphenyl phosphate (TPHP)	Blood & urine	UPLC-ESI-MS/MS (MRM; OPE panel)	targeted	Level 1	TRUE	RT + transitions vs standards	Validated tripleâ€‘quad panel.	Methods
Godbole_2024_EnvEpid	2024	Imidacloprid	Urine (NHANES)	Isotope dilution HPLC-ESI MS/MS (online SPE)	targeted	Level 1	TRUE	RT + transitions vs standards	CDC isotopeâ€‘dilution method.	Methods
Otaru_2024	2024	Glyphosate	Urine (NHANES)	LC-MS/MS with isotope dilution (CDC-style targeted)	targeted	Level 1	TRUE	Isotope dilution; RT + transitions	Targeted quant with labeled standard.	Methods
Agrawal_2025_Gastroenterology	2025	Hydroxybiphenyl	Serum	Untargeted GC-HRMS (EI), spectral library match	untargeted	Level 2	FALSE	EI library match only (no RI/std)	Probable ID via library; no orthogonal.	Methods / SI
Hu_2021	2021	Glyphosate (not measured)	Urine (rat, GBH exposure)	Untargeted LC-HRMS metabolomics	untargeted				Study profiles endogenous metabolites; no validated glyphosate peak.	Methods
Johnson_2025_EnvironHealth	2025	Dibutyl phthalate (DBP)	Semen	LC-HRMS NTA + confirmation vs standard	mixed	Level 1	TRUE	RT + MS/MS vs study standard	Listed among L1 IDs.	Tables / SI
Johnson_2025_EnvironHealth	2025	2Aminophenol	Semen	LC-HRMS NTA + confirmation vs standard	mixed	Level 1	TRUE	RT + MS/MS vs study standard	Listed among L1 IDs.	Tables / SI
Johnson_2025_EnvironHealth	2025	4-Nitrophenol	Semen	LC-HRMS NTA + confirmation vs standard	mixed	Level 1	TRUE	RT + MS/MS vs study standard	Listed among L1 IDs.	Tables / SI
Johnson_2025_EnvironHealth	2025	Hydroxyoctanedioic acid	Semen	LC-HRMS NTA; literature MS/MS spectrum	untargeted	Level 2b	FALSE	Literature/library MS/MS only; no in-house standard/orthogonal	Probable by diagnostic/library spectrum; no sameâ€‘method RT/RI/CCS/MSÂ³.	Tables / SI
Wu_2023_Chemosphere	2023	Endogenous metabolites (170 confirmed)	Plasma (human)	LC-HRMS metabolomics with inâ€‘house standards library	mixed	Level 1 (confirmed) / Level 3 (features)	TRUE (confirmed) / FALSE (features)	RT + MS/MS vs house standards (for confirmed)	Standards present for confirmed identities; many features remain unconfirmed.	Methods / SI
Yang_2024_SciRep	2024	3- and 4-Methylhippuric acids (34MHA) xylene	Urine	UPLC-ESI-MS/MS (NHANES UVOC)	targeted	Level 1	TRUE	Isotope dilution; RT + product ions	Targeted NHANES mVOCs protocol.	Methods
Yang_2024_SciRep	2024	AMCC N,‘dimethylformamide (DMF)	Urine	UPLC-ESI-MS/MS (NHANES UVOC)	targeted	Level 1	TRUE	Isotope dilution; RT + product ions	Targeted NHANES mVOCs protocol.	Methods
Yang_2024_SciRep	2024	CYMA acrylonitrile	Urine	UPLC-ESI-MS/MS (NHANES UVOC)	targeted	Level 1	TRUE	Isotope dilution; RT + product ions	Targeted NHANES mVOCs protocol.	Methods
Yang_2024_SciRep	2024	2HPMA propylene oxide	Urine	UPLC-ESI-MS/MS (NHANES UVOC)	targeted	Level 1	TRUE	Isotope dilution; RT + product ions	Targeted NHANES mVOCs protocol.	Methods
Yang_2024_SciRep	2024	HPMMA/HMPMA crotonaldehyde	Urine	UPLC-ESI-MS/MS (NHANES UVOC)	targeted	Level 1	TRUE	Isotope dilution; RT + product ions	Targeted NHANES mVOCs protocol.	Methods
Yang_2024_SciRep	2024	AAMA acrylamide	Urine	UPLC-ESI-MS/MS (NHANES UVOC)	targeted	Level 1	TRUE	Isotope dilution; RT + product ions	Targeted NHANES mVOCs protocol.	Methods
